# Supplementary material for: Validation of reference genes aiming accurate normalization of qPCR data in soybean upon nematode parasitism and insect attack
Source: PubMed Central journal article supplement (PMC3660166; doi:10.1186/1756-0500-6-196), 2013-05-13
Supplement: 1756-0500-6-196-S1.pdf [file 1756-0500-6-196-S1.pdf]

| Nº | Cultivar     | Organ  | Developmental stage | Time point | Treatment                            |
|----|--------------|--------|---------------------|------------|--------------------------------------|
| 1  | BRSGO Raíssa | Root   | V4                  | -          | -                                    |
| 2  | BRSGO Raíssa | Stem   | V4                  | -          | -                                    |
| 3  | BRSGO Raíssa | Leaf   | V4                  | -          | -                                    |
| 4  | BRSGO Raíssa | Root   | R2                  | -          | -                                    |
| 5  | BRSGO Raíssa | Stem   | R2                  | -          | -                                    |
| 6  | BRSGO Raíssa | Leaf   | R2                  | -          | -                                    |
| 7  | BRSGO Raíssa | Flower | R2                  | -          | -                                    |
| 8  | BRSGO Raíssa | Root   | R4                  | -          | -                                    |
| 9  | BRSGO Raíssa | Stem   | R4                  | -          | -                                    |
| 10 | BRSGO Raíssa | Leaf   | R4                  | -          | -                                    |
| 11 | BRSGO Raíssa | Pod    | R4                  | -          | -                                    |
| 12 | Santa Rosa   | Root   | V2                  | 7 DAI      | Control – non-inoculated root        |
| 13 | Santa Rosa   | Root   | V4                  | 14 DAI     | Control – non-inoculated root        |
| 14 | Santa Rosa   | Root   | V5                  | 21 DAI     | Control – non-inoculated root        |
| 15 | Santa Rosa   | Root   | V6                  | 28 DAI     | Control – non-inoculated root        |
| 16 | Santa Rosa   | Root   | V2                  | 7 DAI      | <i>M. incognita</i> -inoculated root |
| 17 | Santa Rosa   | Root   | V4                  | 14 DAI     | <i>M. incognita</i> -inoculated root |
| 18 | Santa Rosa   | Root   | V5                  | 21 DAI     | <i>M. incognita</i> -inoculated root |
| 19 | Santa Rosa   | Root   | V6                  | 28 DAI     | <i>M. incognita</i> -inoculated root |
| 20 | BRSGO Raíssa | Leaf   | V4                  | 0 min      | Control – uninfested leaf            |
| 21 | BRSGO Raíssa | Leaf   | V4                  | 15 min     | <i>A. gemmatalis</i> -infested leaf  |
| 22 | BRSGO Raíssa | Leaf   | V4                  | 30 min     | <i>A. gemmatalis</i> -infested leaf  |
| 23 | BRSGO Raíssa | Leaf   | V4                  | 60 min     | <i>A. gemmatalis</i> -infested leaf  |
| 24 | BRSGO Raíssa | Leaf   | V4                  | 180 min    | <i>A. gemmatalis</i> -infested leaf  |
