# Supplementary material for: Validation of reference genes aiming accurate normalization of qPCR data in soybean upon nematode parasitism and insect attack
Source: PubMed Central journal article supplement (PMC3660166; doi:10.1186/1756-0500-6-196), 2013-05-13
Supplement: 1756-0500-6-196-S7.pdf [file 1756-0500-6-196-S7.pdf]

| <b>V4</b>                    | <i>GmCYP2</i>         | <i>GmELF1A</i>         | <i>GmTUA5</i>          | <i>GmELF1B</i>         | <i>GmACT11</i>         |
|------------------------------|-----------------------|------------------------|------------------------|------------------------|------------------------|
| <b>Ct ± SD</b>               |                       |                        |                        |                        |                        |
| Leaf                         | 19.39 ± 0.631         | 20.30 ± 0.348          | 20.27 ± 0.498          | 24.58 ± 0.368          | 22.34 ± 0.165          |
| Stem                         | 19.066 ± 0.659        | 19.76 ± 0.649          | 19.9 ± 0.091           | 22.63 ± 0.347          | 20.3 ± 0.846           |
| Root                         | 20.985 ± 1.554        | 22.51 ± 2.624          | 22.61 ± 2.466          | 23.60 ± 1.158          | 23.61 ± 0.846          |
| <b>R2</b>                    |                       |                        |                        |                        |                        |
| Leaf                         | 20.610 ± 0.344        | 20.61 ± 0.696          | 21.42 ± 1.063          | 24.96 ± 0.704          | 22.78 ± 0.433          |
| Stem                         | 20.152 ± 0.079        | 20.01 ± 0.267          | 19.71 ± 0.665          | 22.81 ± 0.765          | 20.73 ± 0.342          |
| Root                         | 23.260 ± 0.839        | 24.29 ± 1.470          | 25.27 ± 1.393          | 26.17 ± 1.842          | 24.83 ± 1.794          |
| Flower                       | 18.824 ± 0.285        | 18.92 ± 0.499          | 21.03 ± 2.854          | 22.61 ± 0.419          | 20.28 ± 0.224          |
| <b>R4</b>                    |                       |                        |                        |                        |                        |
| Leaf                         | 20.464 ± 0.149        | 21.12 ± 0.311          | 21.63 ± 0.346          | 24.65 ± 0.453          | 22.42 ± 0.370          |
| Stem                         | 20.107 ± 0.721        | 20.76 ± 0.859          | 21.68 ± 1.097          | 22.82 ± 0.378          | 22.02 ± 0.386          |
| Root                         | 22.300 ± 0.375        | 23.13 ± 0.978          | 24.44 ± 1.745          | 24.16 ± 0.289          | 23.31 ± 1.303          |
| Pod                          | 19.875 ± 0.443        | 19.56 ± 0.697          | 20.82 ± 0.422          | 23.02 ± 0.468          | 21.13 ± 0.964          |
| <b>Efficiency ± SD / CV%</b> | 0.949 ± 0.031 / 6.338 | 1.157 ± 0.038 / 10.469 | 1.148 ± 0.028 / 9.202  | 1.034 ± 0.049 / 9.364  | 1.118 ± 0.037 / 10.61  |
| <b>V4</b>                    |                       |                        |                        |                        |                        |
|                              | <i>GmUBC2</i>         | <i>GmTUB</i>           | <i>GmG6PD</i>          | <i>GmUBC4</i>          | <i>GmRB7</i>           |
| <b>Ct ± SD</b>               |                       |                        |                        |                        |                        |
| Leaf                         | 23.78 ± 0.619         | 24.77 ± 0.494          | 26.19 ± 0.743          | 23.06 ± 1.032          | 20.51 ± 2.140          |
| Stem                         | 22.33 ± 1.595         | 21.71 ± 0.399          | 21.95 ± 0.510          | 22.53 ± 0.286          | 19.15 ± 1.291          |
| Root                         | 25.65 ± 1.673         | 27.1 ± 4.981           | 23.26 ± 1.919          | 24.64 ± 1.609          | 19.79 ± 2.720          |
| <b>R2</b>                    |                       |                        |                        |                        |                        |
| Leaf                         | 23.99 ± 0.333         | 28.56 ± 2.348          | 24.92 ± 0.294          | 23.78 ± 0.388          | 24.70 ± 0.686          |
| Stem                         | 23.58 ± 0.710         | 23.62 ± 3.643          | 21.99 ± 0.366          | 23.33 ± 0.232          | 20.36 ± 0.999          |
| Root                         | 27.015 ± 0.820        | 28.9 ± 1.285           | 25.87 ± 2.438          | 26.48 ± 1.058          | 22.013 ± 1.424         |
| Flower                       | 23.24 ± 0.717         | 21.9 ± 0.69            | 22.49 ± 0.675          | 23.49 ± 3.000          | 24.06 ± 1.000          |
| <b>R4</b>                    |                       |                        |                        |                        |                        |
| Leaf                         | 24.04 ± 0.357         | 27.42 ± 0.488          | 25.52 ± 0.618          | 23.06 ± 0.237          | 24.76 ± 1.122          |
| Stem                         | 23.7 ± 0.831          | 27.89 ± 3.428          | 22.16 ± 0.434          | 22.31 ± 0.416          | 22.25 ± 0.228          |
| Root                         | 25.03 ± 0.121         | 27.9 ± 1.893           | 23.09 ± 0.554          | 24.24 ± 0.769          | 21.47 ± 1.589          |
| Pod                          | 24.63 ± 0.500         | 23.44 ± 1.789          | 24.07 ± 0.806          | 25.32 ± 4.053          | 22.94 ± 1.875          |
| <b>Efficiency ± SD / CV%</b> | 1.076 ± 0.045 / 8.360 | 1.031 ± 0.032 / 14.575 | 1.107 ± 0.033 / 11.655 | 1.091 ± 0.036 / 10.613 | 0.976 ± 0.053 / 13.537 |

| <b>Control - uninoculated</b>              | <i>GmCYP2</i>          | <i>GmELF1A</i>         | <i>GmTUA5</i>          | <i>GmELF1B</i>         | <i>GmACT11</i>         |
|--------------------------------------------|------------------------|------------------------|------------------------|------------------------|------------------------|
| <b>Ct ± SD</b>                             |                        |                        |                        |                        |                        |
| Root ( 7 d.a.i)                            | 23.92 ± 1.981          | 23.92 ± 1.252          | 24.85 ± 1.139          | 25.07 ± 0.313          | 23.67 ± 1.581          |
| Root ( 14 d.a.i)                           | 23.57 ± 1.194          | 24.62 ± 0.890          | 24.68 ± 0.660          | 25.83 ± 1.837          | 25.35 ± 2.908          |
| Root ( 21 d.a.i)                           | 23.14 ± 1.348          | 23.97 ± 0.876          | 24.95 ± 1.049          | 25.86 ± 1.316          | 24.39 ± 1.922          |
| Root ( 28 d.a.i)                           | 23.85 ± 0.971          | 24.27 ± 0.727          | 25.01 ± 0.701          | 25.25 ± 0.783          | 24.3 ± 1.609           |
| <b><i>M. incognita</i>-inoculated root</b> |                        |                        |                        |                        |                        |
| Root ( 7 d.a.i)                            | 24.03 ± 1.836          | 23.92 ± 0.614          | 24.73 ± 0.575          | 25.1 ± 1.847           | 25.1 ± 3.235           |
| Root ( 14 d.a.i)                           | 22.38 ± 1.202          | 23.21 ± 0.823          | 23.78 ± 0.917          | 25.98 ± 3.283          | 23.76 ± 0.910          |
| Root ( 21 d.a.i)                           | 21.29 ± 0.450          | 22.4 ± 0.706           | 23.7 ± 0.399           | 23.78 ± 0.520          | 23.22 ± 0.930          |
| Root ( 28 d.a.i)                           | 21.82 ± 0.346          | 24.34 ± 1.787          | 24.52 ± 1.102          | 24.31 ± 0.581          | 23.88 ± 1.333          |
| <b>Efficiency ± SD / CV%</b>               | 1.016 ± 0.018 / 12.376 | 0.892 ± 0.034 / 12.079 | 0.885 ± 0.025 / 16.414 | 0.816 ± 0.029 / 15.230 | 0.965 ± 0.030 / 16.890 |

| <b>Control - uninoculated</b>              | <i>GmUBC2</i>       | <i>GmTUB</i>           | <i>GmG6PD</i>         | <i>GmUBC4</i>          | <i>GmRB7</i>          |
|--------------------------------------------|---------------------|------------------------|-----------------------|------------------------|-----------------------|
| <b>Ct ± SD</b>                             |                     |                        |                       |                        |                       |
| Root ( 7 d.a.i)                            | 25.780              | 28.28 ± 1.536          | 23.030                | 26.9 ± 3.369           | 21.13 ± 0.486         |
| Root ( 14 d.a.i)                           | 23.660              | 29.46 ± 0.577          | 23.150                | 25.86 ± 2.162          | 21.54 ± 1.962         |
| Root ( 21 d.a.i)                           | 25.140              | 28.05 ± 1.009          | 22.850                | 26.53 ± 3.300          | 22.32 ± 5.245         |
| Root ( 28 d.a.i)                           | 25.920              | 29.03 ± 0.757          | 24.900                | 25.25 ± 1.678          | 20.87 ± 0.342         |
| <b><i>M. incognita</i>-inoculated root</b> |                     |                        |                       |                        |                       |
| Root ( 7 d.a.i)                            | 24.340              | 28.21 ± 1.349          | 22.14 ±               | 26.24 ± 4.309          | 24.7 ± 7.865          |
| Root ( 14 d.a.i)                           | 25.860              | 27.95 ± 1.540          | 23.13 ±               | 24.33 ± 1.460          | 19.88 ± 0.719         |
| Root ( 21 d.a.i)                           | 25.390              | 27.04 ± 0.730          | 23.21 ±               | 23.19 ± 0.464          | 18.82 ± 5.614         |
| Root ( 28 d.a.i)                           | 26.030              | 28.6 ± 1.419           | 23.87 ±               | 24.14 ± 1.271          | 20.54 ± 1.713         |
| <b>Efficiency ± SD / CV%</b>               | 1.04 ± 0.03 / 11.56 | 0.897 ± 0.024 / 13.170 | 0.940 ± 0.031 / 21.42 | 0.870 ± 0.033 / 13.733 | 0.78 ± 0.029 / 16.962 |

| <i>A. gemmatalis</i> infested leaf | <i>GmCYP2</i>        | <i>GmELF1A</i>       | <i>GmTUA5</i>          | <i>GmELF1B</i>        | <i>GmACT11</i>        |
|------------------------------------|----------------------|----------------------|------------------------|-----------------------|-----------------------|
| <b>Ct ± SD</b>                     |                      |                      |                        |                       |                       |
| Leaf ( 0h) control                 | 20.02 ± 0.148        | 21.57 ± 0.611        | 24.61 ± 1.526          | 25.17 ± 0.690         | 22.69 ± 1.531         |
| Leaf ( 15 min)                     | 20.06 ± 0.363        | 21.60 ± 0.357        | 24.16 ± 0.453          | 25.33 ± 0.517         | 22.07 ± 0.450         |
| Leaf ( 30 min)                     | 21.02 ± 0.188        | 22.46 ± 0.386        | 24.10 ± 1.239          | 26.02 ± 0.606         | 22.44 ± 0.775         |
| Leaf ( 1 h)                        | 20.62 ± 0.152        | 22.16 ± 0.247        | 24.31 ± 0.711          | 25.34 ± 0.490         | 22.35 ± 0.066         |
| Leaf ( 3 h)                        | 20.86 ± 0.423        | 22.27 ± 0.316        | 24.95 ± 0.238          | 25.75 ± 0.488         | 22.78 ± 0.127         |
| <b>Efficiency ± SD / CV%</b>       | 1.156 ± 0.018 / 9.25 | 1.128 ± 0.024 / 8.74 | 1.051 ± 0.028 / 12.327 | 0.972 ± 0.025 / 11.31 | 1.088 ± 0.028 / 12.96 |

  

| <i>A. gemmatalis</i> infested leaf | <i>GmUBC2</i>         | <i>GmTUB</i>          | <i>GmG6PD</i>          | <i>GmUBC4</i>         |
|------------------------------------|-----------------------|-----------------------|------------------------|-----------------------|
| <b>Ct ± SD</b>                     |                       |                       |                        |                       |
| Leaf ( 0h) control                 | 24.64 ± 0.191         | 27.89 ± 0.124         | 24.54 ± 1.632          | 23.18 ± 1.484         |
| Leaf ( 15 min)                     | 24.18 ± 0.68          | 26.81 ± 0.593         | 25.11 ± 1.151          | 22.81 ± 0.658         |
| Leaf ( 30 min)                     | 24.63 ± 0.203         | 28.14 ± 0.551         | 26.01 ± 1.125          | 22.95 ± 1.334         |
| Leaf ( 1 h)                        | 24.65 ± 0.212         | 27.91 ± 0.455         | 25.59 ± 1.067          | 23.25 ± 1.535         |
| Leaf ( 3 h)                        | 24.99 ± 0.309         | 28.53 ± 1.034         | 25.45 ± 1.248          | 23.92 ± 1.256         |
| <b>Efficiency ± SD / CV%</b>       | 1.075 ± 0.028 / 12.27 | 1.027 ± 0.020 / 11.58 | 1.032 ± 0.025 / 12.675 | 0.943 ± 0.027 / 15.41 |
